# Supplementary material
Source: Research Square preprint supplement (doi:10.21203/rs.3.rs-10249388/v1)
Supplement: Supplementary file 1 [file 8147d007b5d432f32027d389.docx]

**Supplementary Materials**

**Embedding Formal Worst-Case Latency Proofs and Memory-Safety Certificates into the snn-mlir MLIR Lowering Pipeline for IEC 62304-Compliant Edge Deployment of Spiking Neural Networks**

Hassan Farooq¹
¹Sargodha Medical College

**S1. Supplementary Equations**

*S1.1 LIF Neuron Dynamics (§2.2.2)*

Membrane potential update:
U[t] = β·U[t−1] + Σᵢ wᵢxᵢ[t]

where U[t] is membrane potential at timestep t, β = 0.9 is the decay factor, and Σᵢ wᵢxᵢ[t] is the weighted sum of input spikes at timestep t.

Reset (applied after spike emission, hard-reset convention):
U[t] ← U[t]·(1 − S[t])

Spike emission:
S[t] = 1 if U[t] > θ, else S[t] = 0, where θ = 1.0

*S1.2 IPET ILP Formulation (§2.4)*

Flow variable per CFG edge e:
xₑ ∈ ℤ≥0

Objective (maximize total weighted cycle cost over the CFG):
maximize Σₑ cₑ·xₑ

subject to:

- Flow conservation at each basic block: Σ(incoming xₑ) = Σ(outgoing xₑ)
- Loop-back bound on the timestep loop: x_loopback ≤ T_steps, where T_steps = 512

This was solved with scipy.optimize.linprog and cross-validated with PuLP, yielding 7 flow variables and 6 constraints (Table 2).

**S2. Supplementary Table 1 — Model and Analysis Parameters (full)**

| **Parameter** | **Symbol** | **Value** | **Unit** | **Source** |
| --- | --- | --- | --- | --- |
| LIF decay factor | β | 0.9 | dimensionless | snnTorch default |
| Spike threshold | θ | 1.0 | dimensionless | snnTorch default |
| Input channels | — | 23 | channels | CHB-MIT chb01/chb02 subset |
| Window length | T | 2 | s | WINDOW_SEC = 2 |
| Timesteps per window | T_steps | 512 | steps | 256 Hz × 2 s |
| EEG sampling rate | f_s | 256 | Hz | CHB-MIT specification |
| Bandpass filter | — | 0.5–40 | Hz | Standard clinical EEG band |
| Spike encoding | — | μ + 2σ | per channel | Per-channel, per-window |
| SNN architecture | — | 11,776→64→32→2 | neurons | Flattened input: 23 × 512 |
| Class balance cap | — | 5:1 | ratio | Random undersampling |
| Seizure windows | — | 604 | — | chb01 + chb02 combined |
| Non-seizure windows | — | 3,020 | — | 5:1 cap applied |
| Total windows | — | 3,624 | — | 604 + 3,020 |
| Training epochs | — | 30 | — | Best val BA 78.7% at epoch 30 |
| Learning rate | η | 1×10⁻³ | — | Adam default |
| Surrogate gradient k | k | 25 | — | Fast-sigmoid |
| Train/Val/Test split | — | 70%/10%/20% | — | Stratified by class |
| Train/Val/Test N | — | 2,536 / 363 / 725 | windows | Stratified split |

**Supplementary Table 2 — Compilation, WCET, and Timing Parameters (full)**

| **Parameter** | **Value** | **Unit** | **Source** |
| --- | --- | --- | --- |
| LLVM version | 22.1.8 | — | Confirmed: certificate.json |
| snn-mlir commit | 89b65e0 | — | Build log |
| ILP flow variables | 7 | — | IPET ILP (§2.4) |
| ILP constraints | 6 | — | IPET ILP (§2.4) |
| IPET WCET bound (per layer, uniform) | 5,634 | cycles | All 3 layers |
| Certified network bound (3 × 5,634) | 16,902 | cycles | Safety-relevant for IEC 62304 |
| Certified network latency | 100.6 | µs | 16,902 cycles @ 168 MHz |
| Measured network execution | 8,627 | cycles (51.4 µs) | Observed within certified bound |
| Deadline margin (certified) | 497× | — | 16,902 cycles vs. 50 ms |
| Deadline margin (measured) | 974× | — | 8,627 cycles vs. 50 ms |
| ARM target | Cortex-M4F | — | Timing model (cross-arch. approx.) |
| FMAC latency | 1 (+1 stall) | cycles | ARM Cortex-M4F TRM r0p1 |
| FCMP latency | 1 | cycles | ARM Cortex-M4F TRM r0p1 |
| FSTS latency | 2 | cycles | ARM Cortex-M4F TRM r0p1 |
| LDR latency | 2 | cycles | ARM Cortex-M4F TRM r0p1 |
| LIF layers annotated | 3 | — | lif_layer1/2/3 |
| Lean4 stubs generated | 3 | — | lean_stubs/ directory |
| Pipeline runtime (certify.py) | 0.5 | s | Measured |

**Supplementary Table 3 — IEC 62304 Class B Artifact Coverage (full)**

| **Clause** | **Requirement** | **Generated Artifact** | **Coverage** |
| --- | --- | --- | --- |
| §5.1 | Software development planning | environment_check.txt, Colab notebooks | Full |
| §5.2 | Software requirements analysis | Research log, gap analysis | Full |
| §5.3 | Software architectural design | CFG documentation, NIR graph JSON | Full |
| §5.4 | Software detailed design | Annotated C11 source, annotation notes | Full |
| §5.5 | Software unit implementation | Compiled C11 output | Full |
| §5.6 | Software integration & testing | Python vs. C11 divergence test | Partial |
| §5.7 | Software system testing | End-to-end inference test on 377 inputs, py_spike_counts.npy reference | Partial |
| §5.8 | Software release | Repository not yet published | None |
| §7.1 | Software risk management | Not performed | None |
| §8.0 | Software configuration management | Version-pinned snapshots | Full |

Score: 5×1.0 + 2×0.5 = 6.0/8.0 (§5.1–§5.8 only). §7.1 and §8.0 are supplementary categories outside this denominator.

**S3. Software Environment (full, §2.7)**

snnTorch 0.9.4; NIR 1.0.7; snn-mlir commit 89b65e0 (built against LLVM 22.1.8); MNE-Python 1.12.1; SciPy 1.16.3; PuLP 3.3.2. Compiler flags: GCC with -O0 -shared -fPIC -mfpu=fpv4-sp-d16 -mfloat-abi=hard.

**S4. Data and Code Availability**

Source EEG data: PhysioNet CHB-MIT database (https://physionet.org/content/chbmit/1.0.0/). Preprocessed spike tensors, trained weights, full build artifact bundle, and all code (preprocessing, training, compilation pipeline, IPET annotation pass, Lean4 stub generation, certify.py) are archived at the project's Zenodo DOI: https://doi.org/10.5281/zenodo.21188458.
